# Supplementary material for: Acetyl‐coenzyme A carboxylase inhibition reduces de novo lipogenesis in overweight male subjects: A randomized, double‐blind, crossover study
Source: PubMed Central journal article supplement — Hepatology. 2017 Jul 5;66(2):324–34. doi: 10.1002/hep.29246 (PMC5599970; doi:10.1002/hep.29246), 2017-07-05

## **Supplemental Figures:**

### **Supplemental Figure 1: PK-PD Correlation for Fractional Hepatic DNL.**

Change from fasting baseline-adjusted fractional DNL by AUEC and DNL at 10 hr post-dose for NDI-010976 treated individuals was normalized to matched placebo and correlated to plasma concentration of NDI-010976 for each individual subject by A) plasma  $AUC_{0-t}$ , B) plasma concentrations at 10 hr post-dose, or C) plasma  $C_{max}$ . Data were fitted using a logarithmic trendline function (GraphPad Prism 6, Microsoft Excel 2013). Correlation of individual NDI-010976 plasma concentration to fractional hepatic DNL normalized as % maximal DNL at each time point is demonstrated in panel D. % maximal fractional DNL represents change from fasted baseline-adjusted DNL normalized to matched placebo at 10 hr for each individual subject. All time points were analyzed (n=268) excluding 20 data points that had plasma concentrations below the limit of quantitation. Filled markers indicate data point outliers exhibiting less DNL response than predicted by the observed plasma exposure.

A

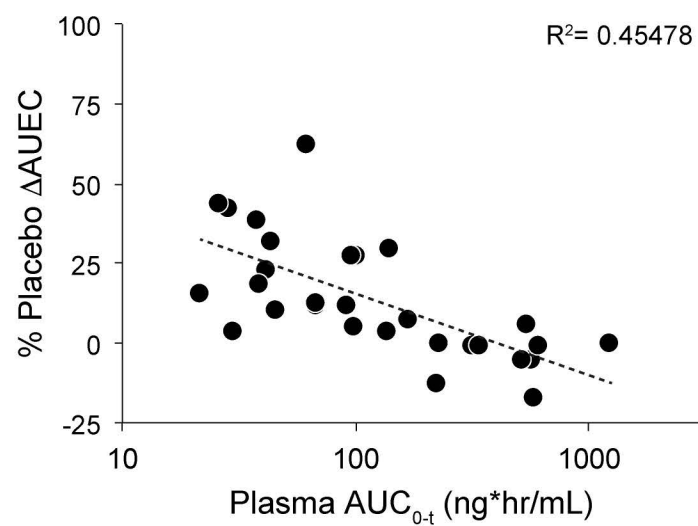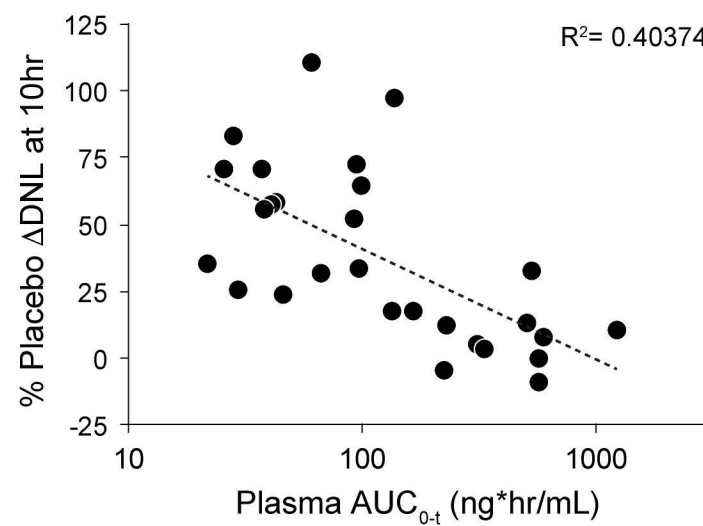

B

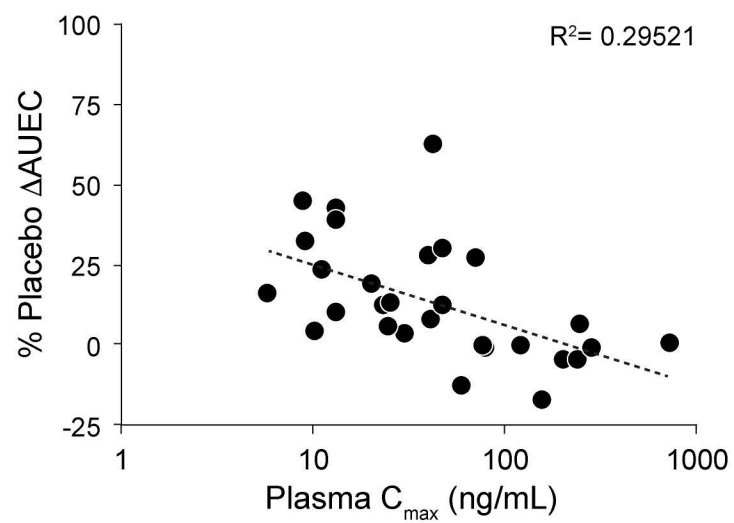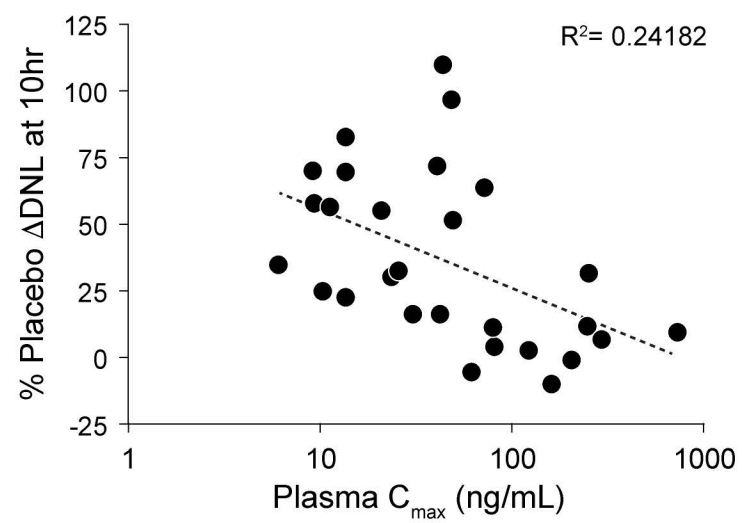

C

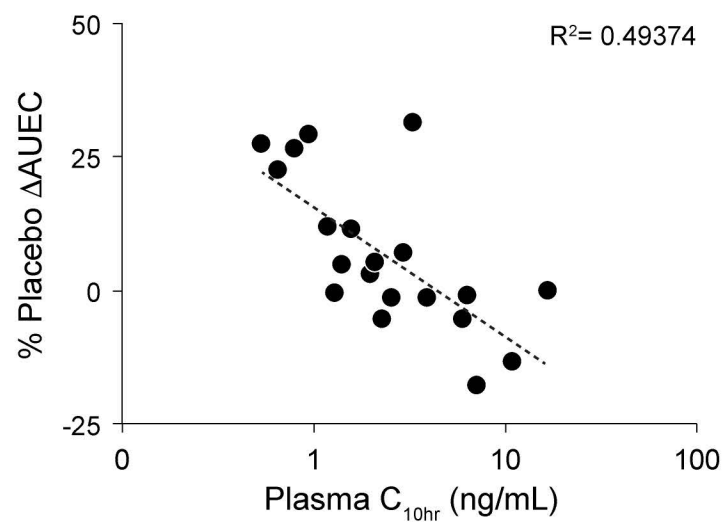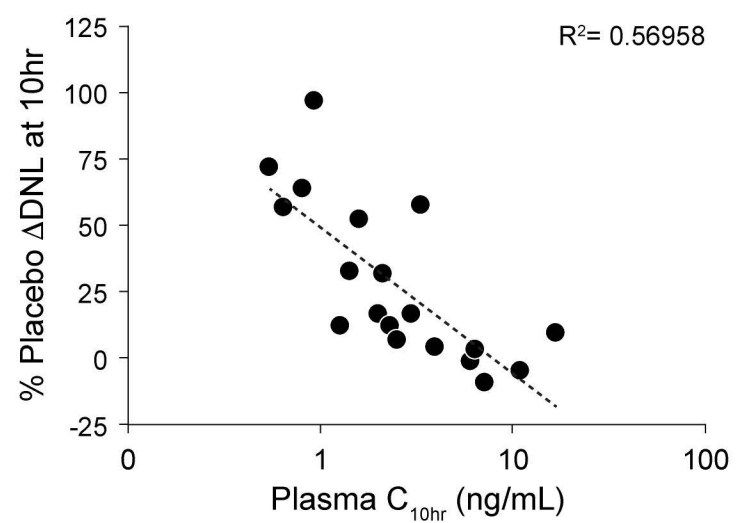

D

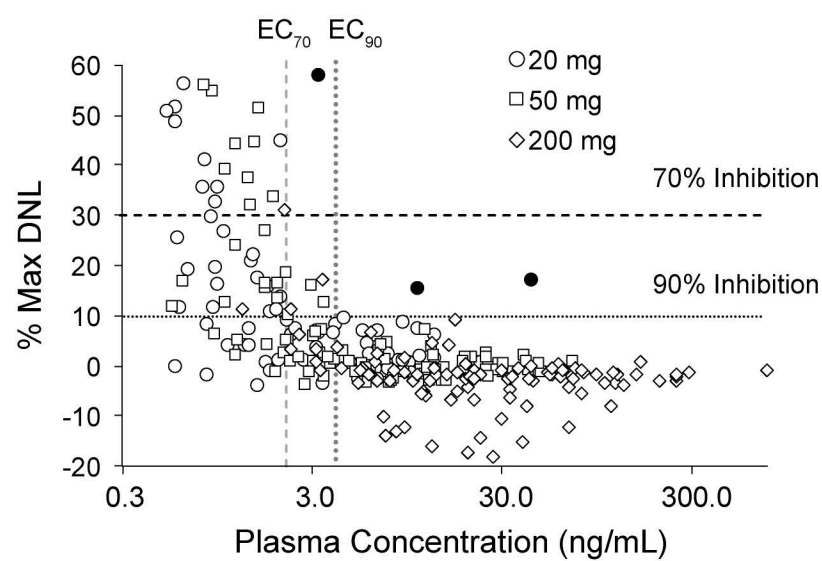

Supplement: HEP-66-324-s001.pdf [file HEP-66-324-s001.pdf]
